# Supplementary material for: Genistein up-regulates miR-20a to disrupt spermatogenesis via targeting Limk1
Source: PubMed Central journal article supplement (PMC5601687; doi:10.18632/oncotarget.17637), 2017-05-05
Supplement: oncotarget-08-58728-s001.pdf [file oncotarget-08-58728-s001.pdf]

# Genistein up-regulates miR-20a to disrupt spermatogenesis via targeting Limk1

## SUPPLEMENTARY MATERIALS

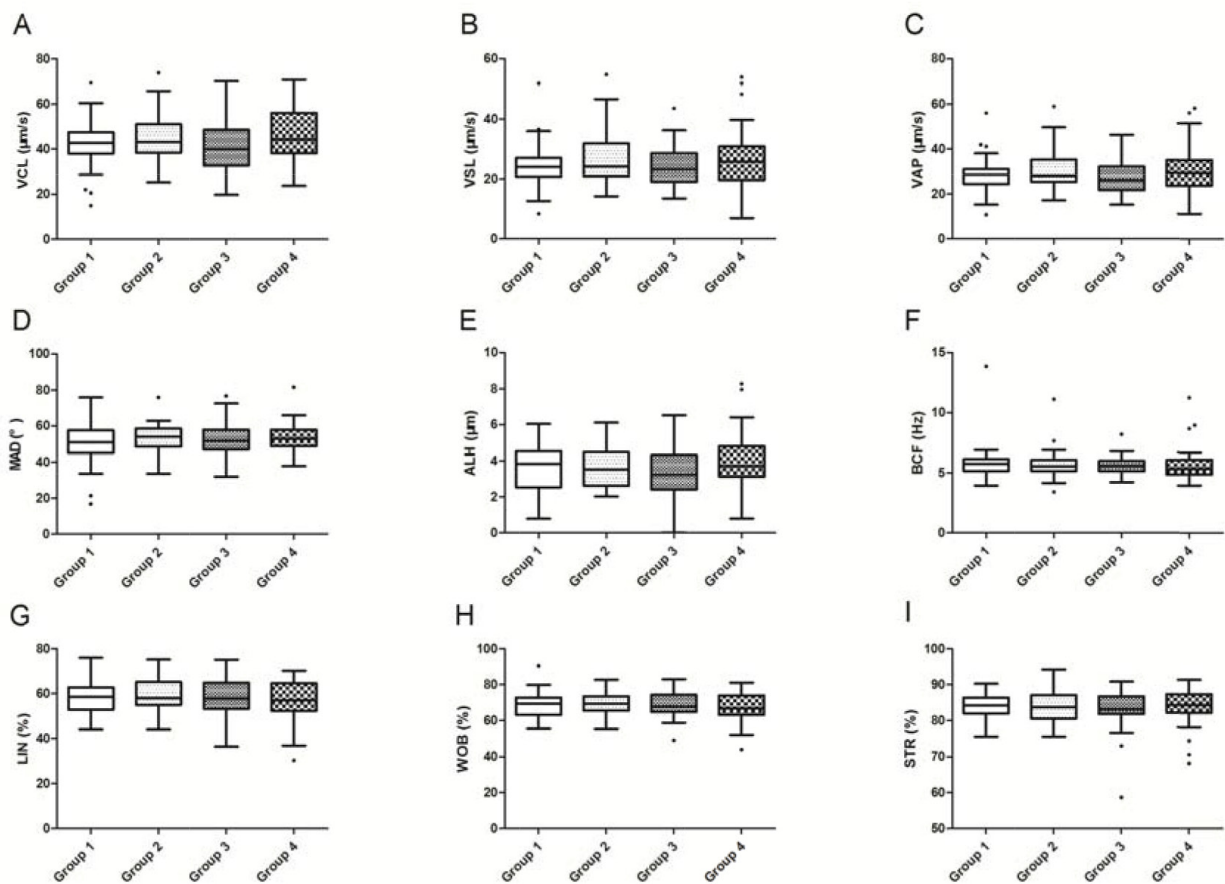

Supplementary Figure 1: Relationship between GEN exposure and other sperm characteristics in recruited subjects. (A-I) represents VCL, VSL, VAP, MAD, ALH, BCF, LIN, WOB and STP, respectively.

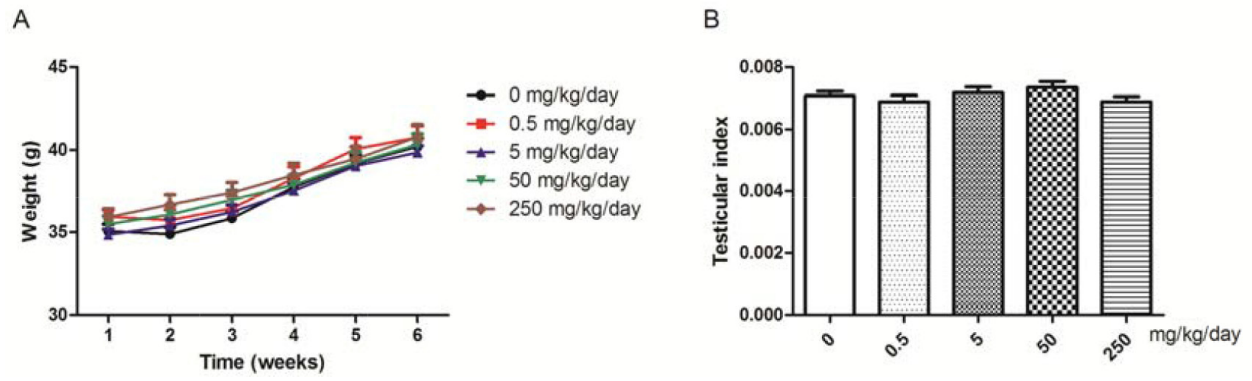

**Supplementary Figure 2: Changes in body weight and testicular index of the mice after treated with GEN at different doses.** (A) represents the changes of body weight weekly and (B) represents testicular index in different groups. N = 20 per group.

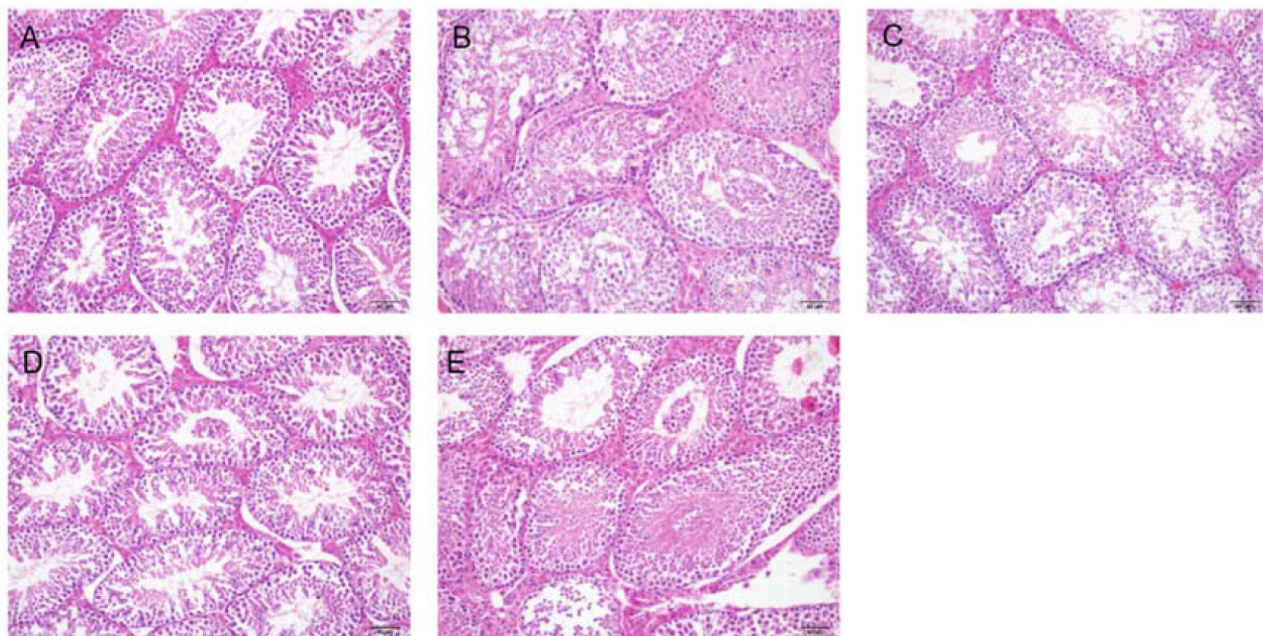

**Supplementary Figure 3: Microscopy of cross section of H&E stained testis from control and GEN treated mice. (A-E)** represents testis from mice treated with GEN at doses of 0, 0.5, 5, 50, 250 mg/kg/day, respectively. Scale bars = 50 $\mu$ m. N = 6 per group.

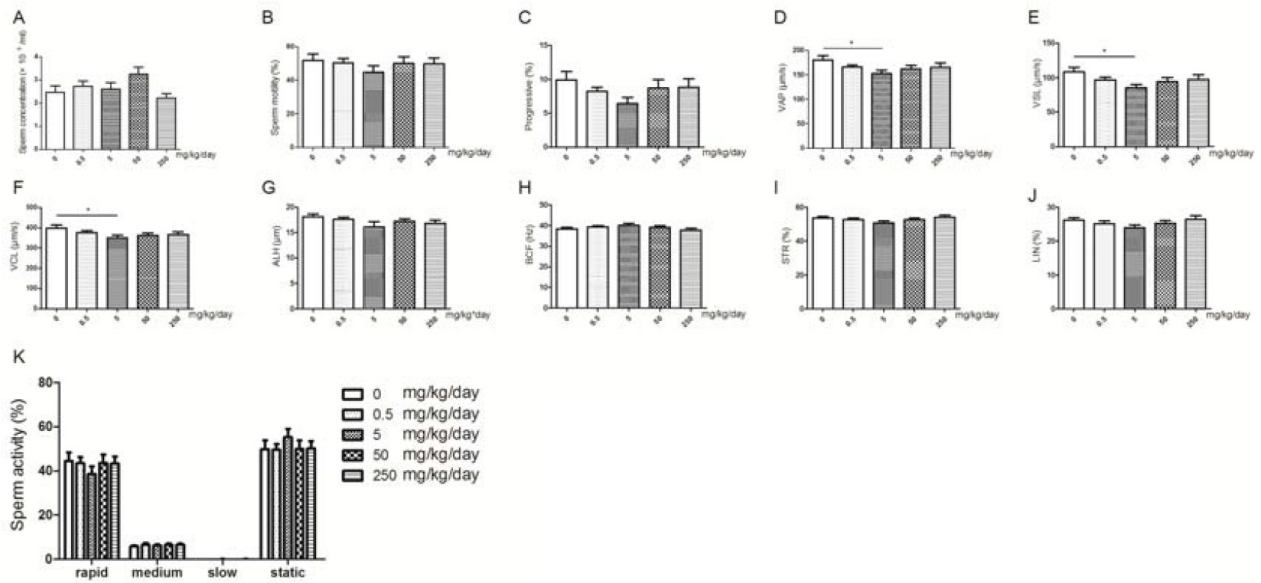

**Supplementary Figure 4: Changes in sperm quality of mice after treated with GEN at different doses.** (A-K) represents sperm concentration, sperm motility, progressive, VAP, VSL, VCL, ALH, BCF, STR, LIN & sperm activity, respectively. N = 20 per group. \* $P < 0.05$  versus control group.

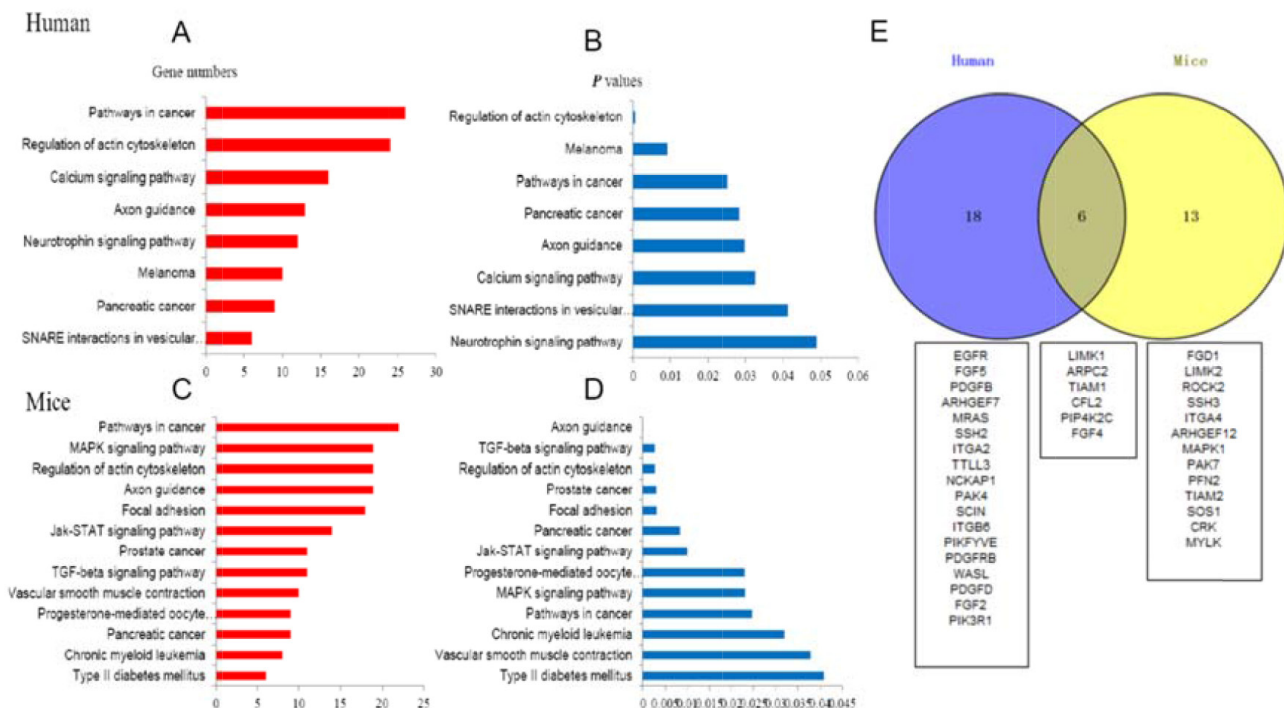

**Supplementary Figure 5: Target genes prediction and pathway enrichment of miR-20a in human and mice.** (A and C) represent numbers of target gene of miR-20a enriched in pathways in human and mice respectively; (B and D) represent P value for pathway enrichment respectively. (E) represents the target genes both in human and mice by Venn diagram; green (a) and blue (b) spot represents specific target genes enriched in regulation of actin cytoskeleton pathways in human and mice, respectively; red (c) spot represents target genes both enriched in regulation of actin cytoskeleton pathways in human and mice.

Supplementary Table 1: Metabolism results

| Metabolite name        | Fold vs Control | <i>P</i> value |
|------------------------|-----------------|----------------|
| Dehydroepiandrosterone | 0.336           | 0.011          |
| Dodecanoic acid        | 1.435           | 0.020          |
| Capric acid            | 1.419           | 0.021          |
| Trizma Acetate         | 0.695           | 0.031          |
| 7b-Hydroxycholesterol  | 0.576           | 0.033          |
| Dodecanedioic acid     | 0.654           | 0.038          |
| Pyroglutamic acid      | 0.754           | 0.043          |
| Xanthurenic acid       | 0.444           | 0.043          |

**Supplementary Table 2: Primers for miR-17-92 and Limk1, as well as references**

| Name          | Primer-F (5'-3')                | Primer-R (5'-3')                            |
|---------------|---------------------------------|---------------------------------------------|
| hsa-miR-17    | ACACTCCAGCTGGGCAAAGTGCTTACAGTGC | CTCAACTGGTGTCTGGAGTCGGCAATTCAGTTGAGCTACCTGC |
| hsa-miR-18a   | ACACTCCAGCTGGGACTGCCCTAAGTGCTCC | CTCAACTGGTGTCTGGAGTCGGCAATTCAGTTGAGCCAGAAGG |
| hsa-miR-19a   | ACACTCCAGCTGGGTGTGCAAATCTATGCAA | CTCAACTGGTGTCTGGAGTCGGCAATTCAGTTGAGTCAGTTTT |
| hsa-miR-19b-1 | ACACTCCAGCTGGGAGTTTTGCAGGTTTGCA | CTCAACTGGTGTCTGGAGTCGGCAATTCAGTTGAGGCTGGATG |
| hsa-miR-20a   | ACACTCCAGCTGGGTAAAGTGCTTATAGTGC | CTCAACTGGTGTCTGGAGTCGGCAATTCAGTTGAGCTACCTGC |
| hsa-miR-92a-1 | ACACTCCAGCTGGGAGGTTGGGATCGGTTGC | CTCAACTGGTGTCTGGAGTCGGCAATTCAGTTGAGAGCATTGC |
| mmu-miR-17    | ACACTCCAGCTGGGCAAAGTGCTTACAGTGC | CTCAACTGGTGTCTGGAGTCGGCAATTCAGTTGAGCTACCTGC |
| mmu-miR-18a   | ACACTCCAGCTGGGACTGCCCTAAGTGCTC  | CTCAACTGGTGTCTGGAGTCGGCAATTCAGTTGAGCAGAAGGA |
| mmu-miR-19a   | ACACTCCAGCTGGGTGTGCAAATCTATGCAA | CTCAACTGGTGTCTGGAGTCGGCAATTCAGTTGAGTCAGTTTT |
| mmu-miR-19b-1 | ACACTCCAGCTGGGAGTTTTGCAGGTTTGCA | CTCAACTGGTGTCTGGAGTCGGCAATTCAGTTGAGGCTGGATG |
| mmu-miR-20a   | ACACTCCAGCTGGGTAAAGTGCTTATAGTGC | CTCAACTGGTGTCTGGAGTCGGCAATTCAGTTGAGCTACCTGC |
| mmu-miR-92a-1 | ACACTCCAGCTGGGAGGTTGGGATTTGTCGC | CTCAACTGGTGTCTGGAGTCGGCAATTCAGTTGAGAGCATTGC |
| U6            | CTCGCTTCGGCAGCACA               | AACGCTTCACGAATTTGCGT                        |
| Limk1         | GGGGACACCTACACACTGGT            | GGATCTGTTTCGATGACTGGAGT                     |
| Gapdh         | GCACCGTCAAGGCTGAGAAC            | GGATCTCGCTCCTGGAAGATG                       |
| URP           | TGGTGTCTGGAGTCG                 |                                             |
